# Supplementary material for: Integrating evolutionary and regulatory information with a multispecies approach implicates genes and pathways in obsessive-compulsive disorder
Source: PubMed Central journal article supplement (PMC5645406; doi:10.1038/s41467-017-00831-x), 2017-10-17
Supplement: 41467_2017_831_MOESM3_ESM.pdf [file 41467_2017_831_MOESM3_ESM.pdf]

1 **Description of Additional Supplementary Files**

2

3 File Name: Supplementary Data 1

4 Description: Gene-based variant burden test results (a) List of 608 Targeted genes. (b) 46 variants  
5 used in PolyStrat tests that yielded significant gene-based variant burden. (c) Five genes' candidate  
6 variant enrichments in genotyping data.

7

8 File Name: Supplementary Data 2

9 Description: Pathway-based variant burden test results for 989 GO terms.

10

11 File Name: Supplementary Data 3

12 Description: Candidate variants and their frequencies. (a) 218 candidate variants from five genes.  
13 Summary genotyping results of these variants in the (b) 1st cohort, (c) 2nd cohort, and (d) combined  
14 (1st + 2nd) cohort.

15

16 File Name: Supplementary Data 4

17 Description: Probe sequences for EMSA.

18

19
